# Supplementary material for: Macrophage Depletion Attenuates Extracellular Matrix Deposition and Ductular Reaction in a Mouse Model of Chronic Cholangiopathies
Source: PubMed Central journal article supplement (PMC5019458; doi:10.1371/journal.pone.0162286), 2016-09-12
Supplement: pone.0162286.s002.pdf [file pone.0162286.s002.pdf]

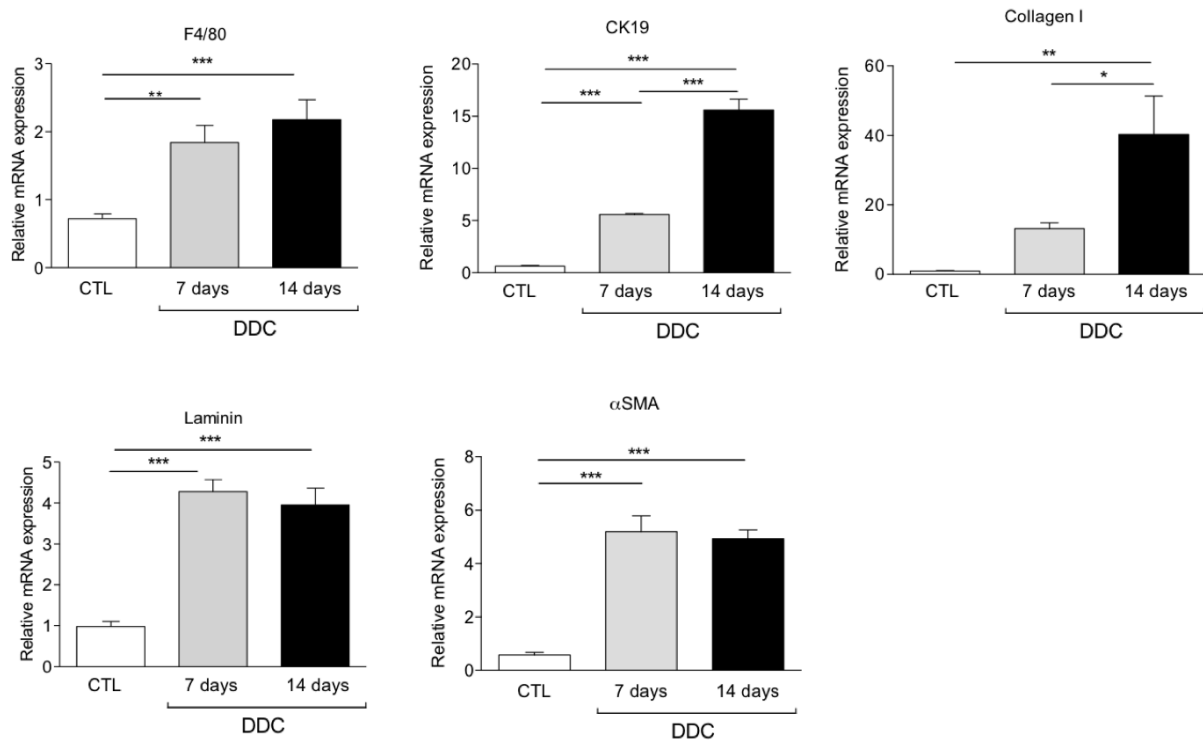

**Supplementary Figure S2: Analysis of mRNA expression levels of F4/80, CK19, Collagen-I, Laminin and  $\alpha$ SMA genes in DDC treated mice.** Livers of control animals and mice subjected to a 7 or 14 day DDC-diet were collected. Hepatic mRNA expression of F4/80, CK19, Collagen-1, laminin and  $\alpha$ -SMA was normalized to GAPDH mRNA as reference gene and expressed in relation to the mean value in untreated controls. All data are presented as mean  $\pm$  SEM for n=4/group, \*p<0.05, \*\*p<0.01, \*\*\*p<0.001.
