# Supplementary material for: Macrophage Depletion Attenuates Extracellular Matrix Deposition and Ductular Reaction in a Mouse Model of Chronic Cholangiopathies
Source: PubMed Central journal article supplement (PMC5019458; doi:10.1371/journal.pone.0162286), 2016-09-12
Supplement: pone.0162286.s004.pdf [file pone.0162286.s004.pdf]

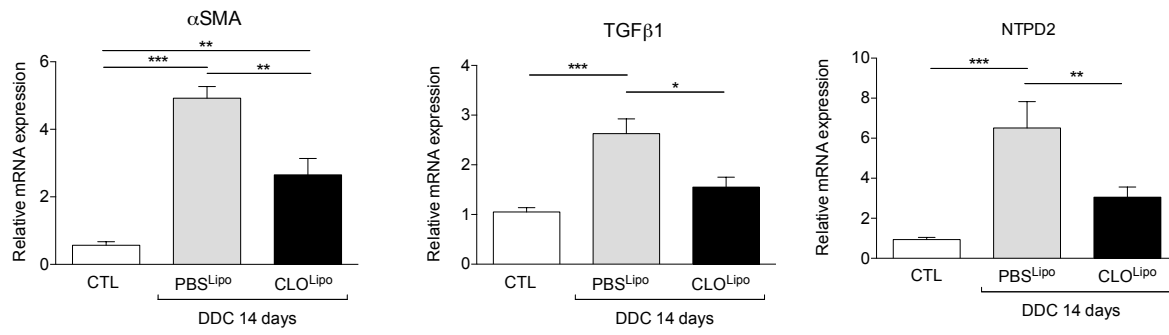

**Supplementary Figure S4: mRNA expression of profibrogenic genes in DDC treated mice.** Hepatic mRNA expression of  $\alpha$ -SMA, TGF- $\beta$  (markers of profibrogenic hepatic stellate cell activity) and NTPD2 expressed in relation to the mean value in untreated controls. All data are presented as mean  $\pm$  SEM for n=4/group, \*p<0.05, \*\*p<0.01, \*\*\*p<0.001.
