# Supplementary material for: Macrophage Depletion Attenuates Extracellular Matrix Deposition and Ductular Reaction in a Mouse Model of Chronic Cholangiopathies
Source: PubMed Central journal article supplement (PMC5019458; doi:10.1371/journal.pone.0162286), 2016-09-12
Supplement: pone.0162286.s005.pdf [file pone.0162286.s005.pdf]

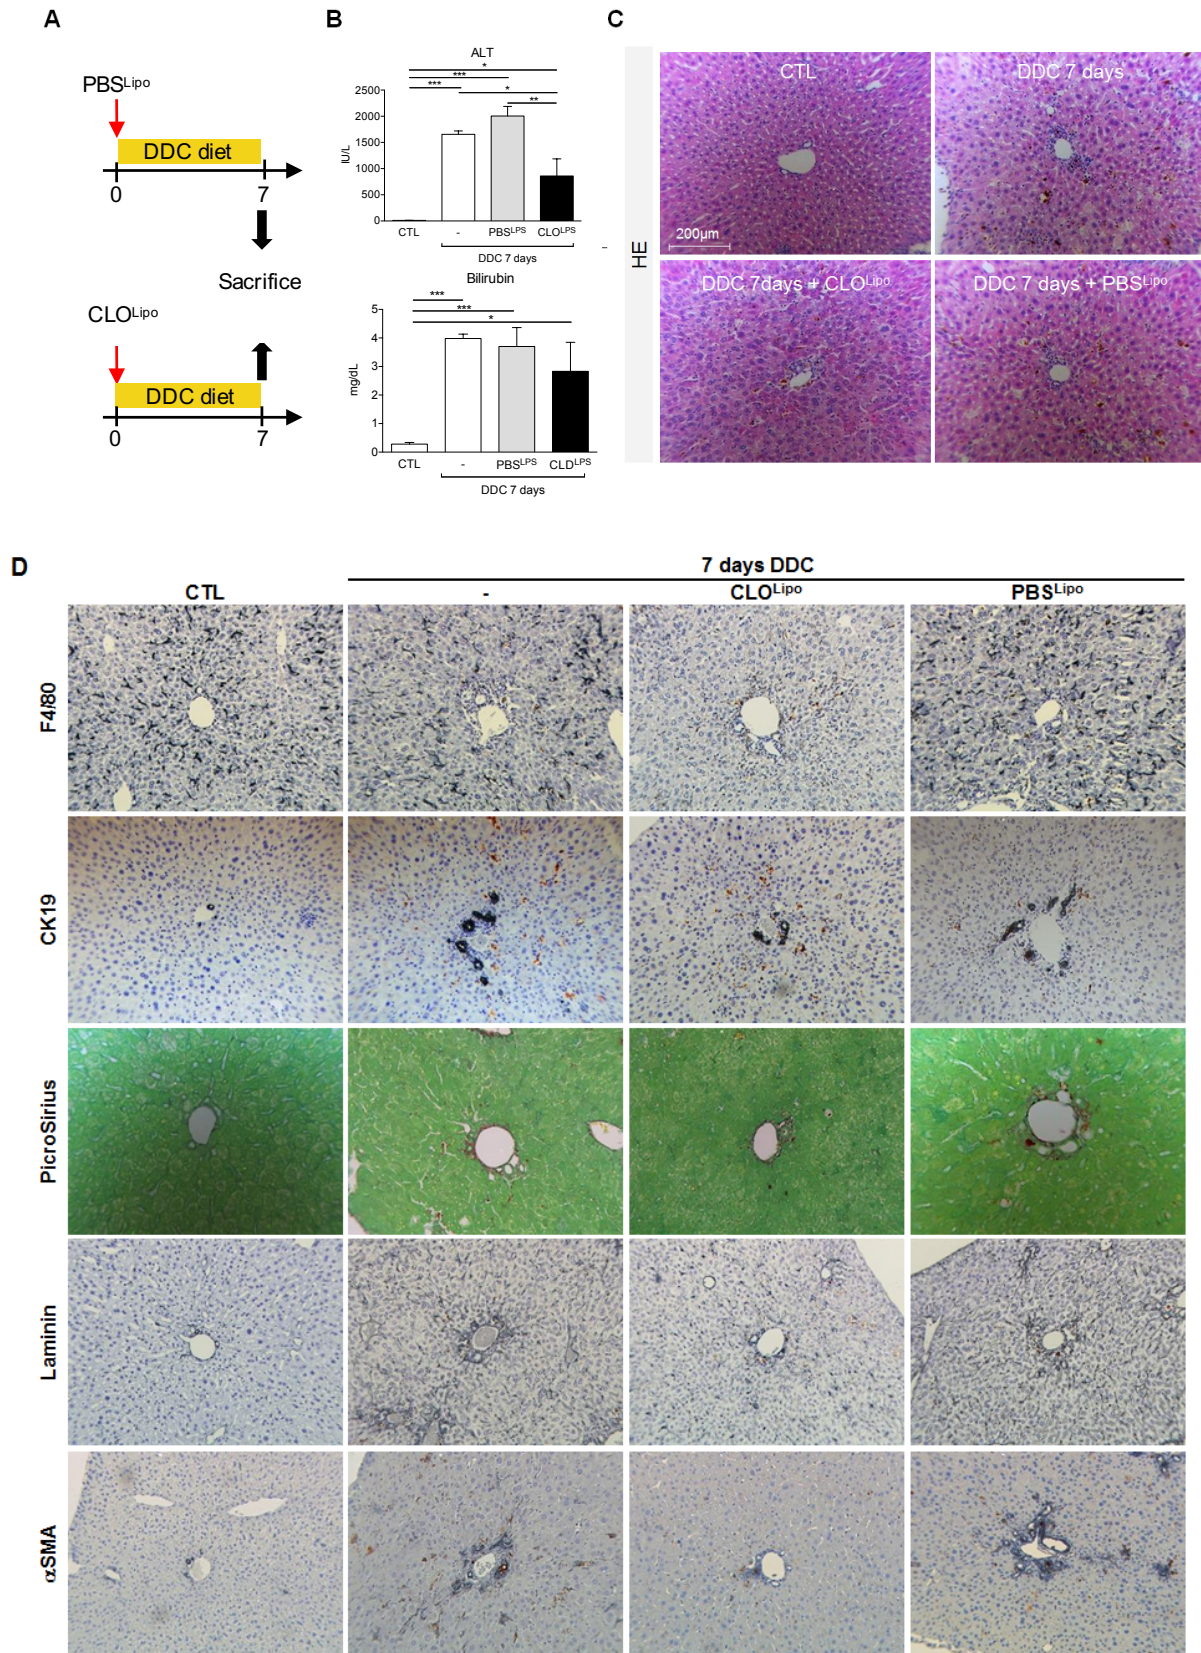

**Supplementary Figure S5: Impact of Clodronate in a prophylactic setting.** (A) Experimental setting. (B) ALT and Total bilirubin serum levels were measured from control animals and mice subjected to a 7 day DDC diet in co-treatment with either CLO<sup>Lipo</sup> or PBS<sup>Lipo</sup> from the beginning of the experiment. Liver sections of the same mice as mentioned above, were stained with HE (C), Picro-Sirius and for F4/80, CK19, Laminin, and α-Sma as described in material and methods (D). All single stained images were taken in 20x, original magnification. All data are presented as mean ± SEM for n=5/group. \*p<0.05, \*\*p<0.01, \*\*\*p<0.001 compared to controls.
