# Supplementary material for: Macrophage Depletion Attenuates Extracellular Matrix Deposition and Ductular Reaction in a Mouse Model of Chronic Cholangiopathies
Source: PubMed Central journal article supplement (PMC5019458; doi:10.1371/journal.pone.0162286), 2016-09-12
Supplement: pone.0162286.s006.pdf [file pone.0162286.s006.pdf]

**A**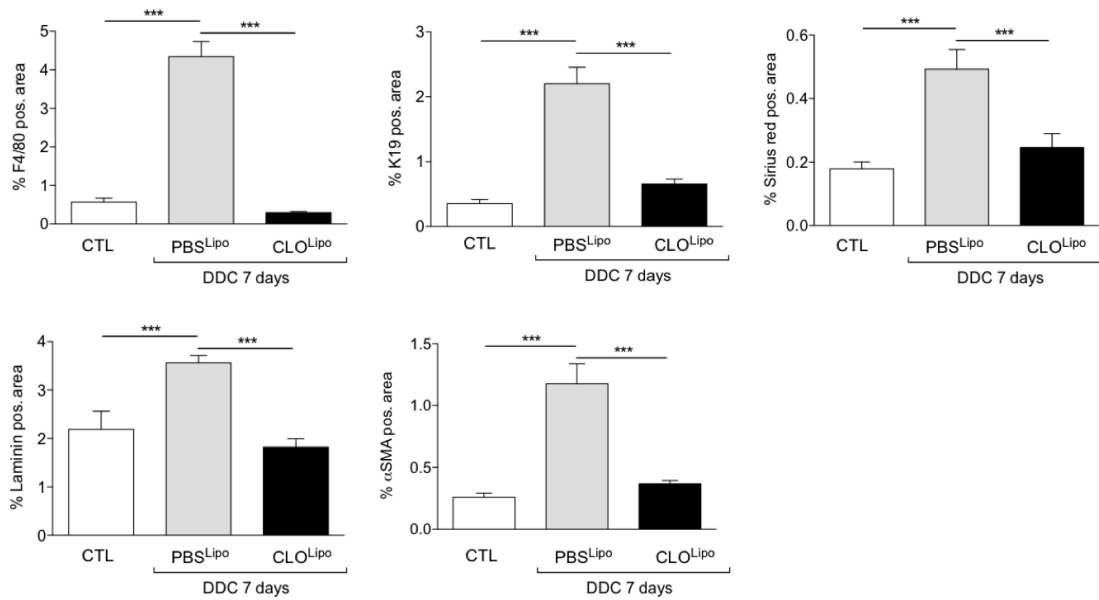**B**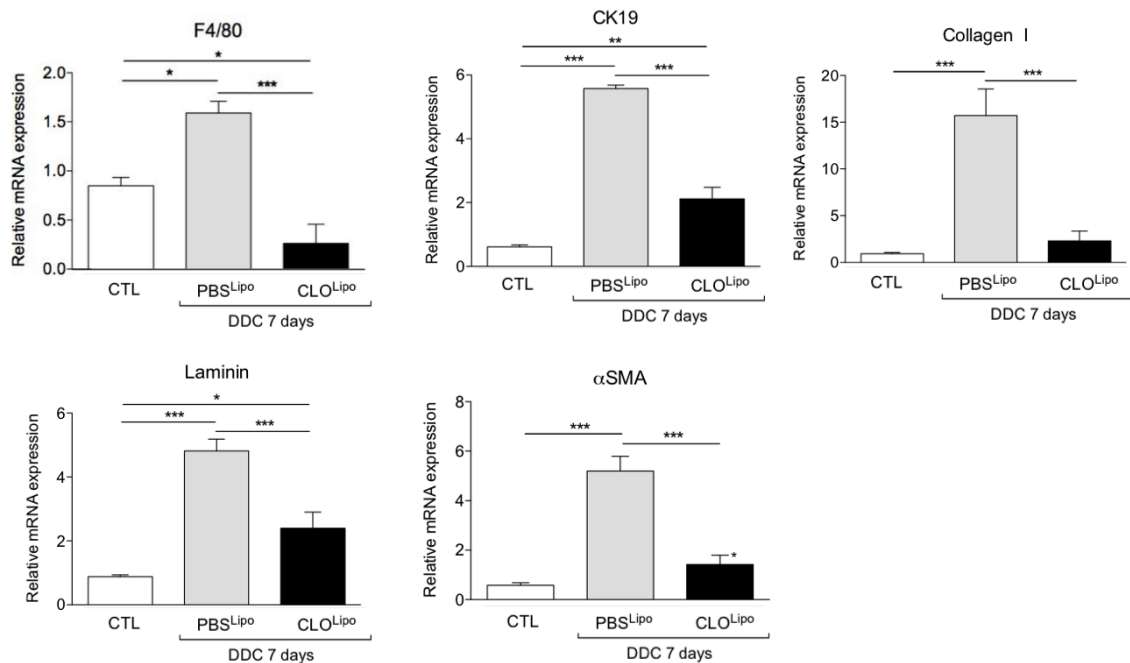

**Supplementary Figure S6: Morphometric quantification and analysis of mRNA expression of F4/80, CK19, Collagen-I, Laminin and αSMA genes in DDC treated mice co-treated with Clodronate.** Livers of control animals and mice subjected to a 7 day DDC-diet in co-treatment with either CLO<sup>Lipo</sup> or PBS<sup>Lipo</sup> at the beginning of the experiments were collected. (A) Morphometric analysis for each corresponding marker presented in supplementary Figure S6. The percentage of F4/80-, CK19-, Sirius red-, Laminin- and αSMA-positive area per field was assessed as described in detail in materials and methods section (B) Hepatic mRNA expression of F4/80, CK19, Collagen-1, laminin and α-SMA was normalized to GAPDH mRNA as reference gene and expressed in relation to the mean value in untreated controls. All data are presented as mean ± SEM for n=4/group, \*p<0.05, \*\*p<0.01, \*\*\*p<0.001.
