# Supplementary material for: Macrophage Depletion Attenuates Extracellular Matrix Deposition and Ductular Reaction in a Mouse Model of Chronic Cholangiopathies
Source: PubMed Central journal article supplement (PMC5019458; doi:10.1371/journal.pone.0162286), 2016-09-12
Supplement: pone.0162286.s008.pdf [file pone.0162286.s008.pdf]

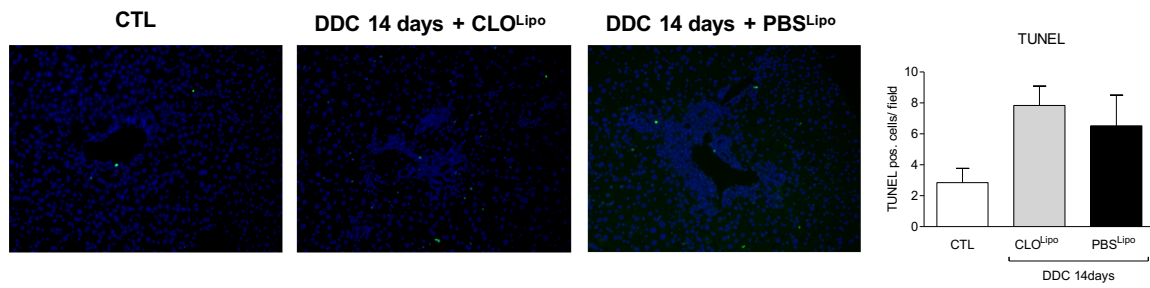

**Supplementary Figure S8: Representative images of TUNEL stainings carried out on Control, DDC 14 days co-treated with CLO<sup>Lipo</sup> or PBS<sup>Lipo</sup>. The quantification is presented in the main text.**
